# Supplementary material for: Concentration Dependent Effect of Quaternary Amines on the Adhesion of U251-MG Cells
Source: MDPI journal article supplement (doi:10.3390/gels8120827), 2022-12-15
Supplement: s1 [file s1]

Supplementary

# Concentration Dependent Effect of Quaternary Amines on the Adhesion of U251-MG Cells

Nils Stamm <sup>1</sup>, Kristin Glotzbach <sup>2</sup>, Andreas Faissner <sup>2,\*</sup> and Ralf Weberskirch <sup>1,\*</sup>

<sup>1</sup> Faculty of Chemistry and Chemical Biology, TU Dortmund University, 44227 Dortmund, Germany

<sup>2</sup> Department of Cell Morphology and Molecular Neurobiology, Ruhr Universität Bochum, 44801 Bochum, Germany

\* Correspondence: andreas.faissner@rub.de (A.F.); ralf.weberskirch@tu-dortmund.de (R.W.);  
Tel.: +49-234-32-28851 (A.F.); +49-231-755-3863 (R.W.)

## Supplementary Data

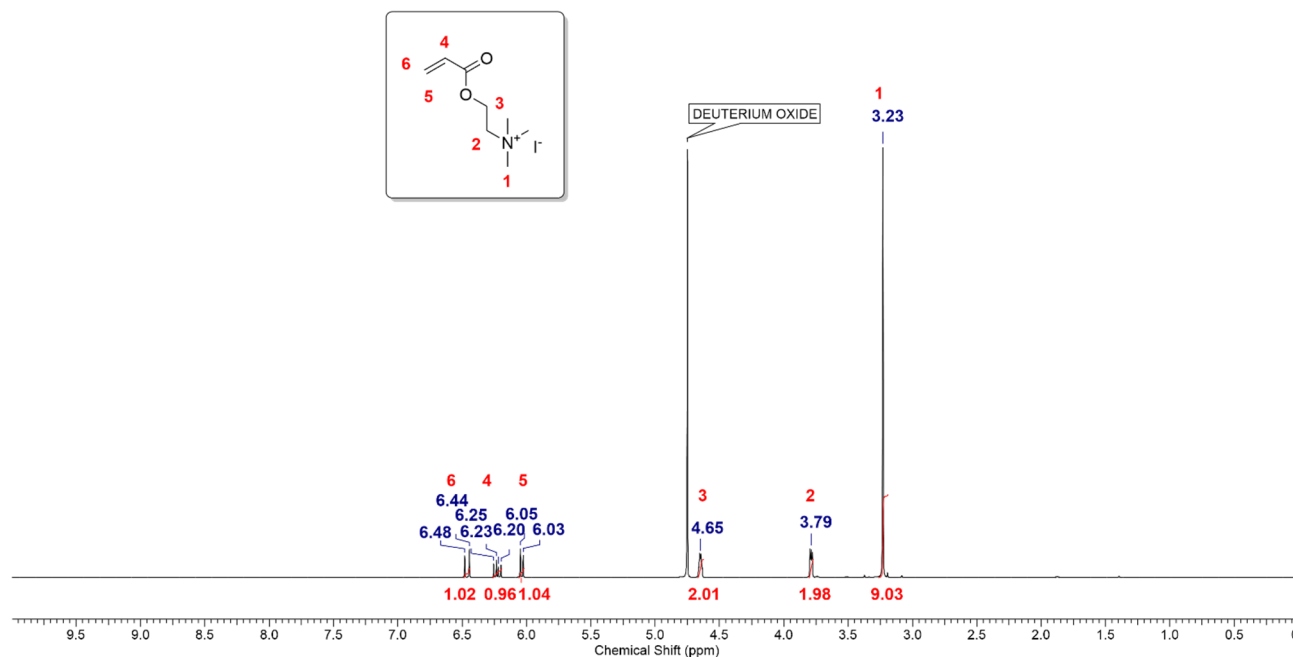

**Figure S1.** <sup>1</sup>H-NMR spectrum of TMAEA in D<sub>2</sub>O.

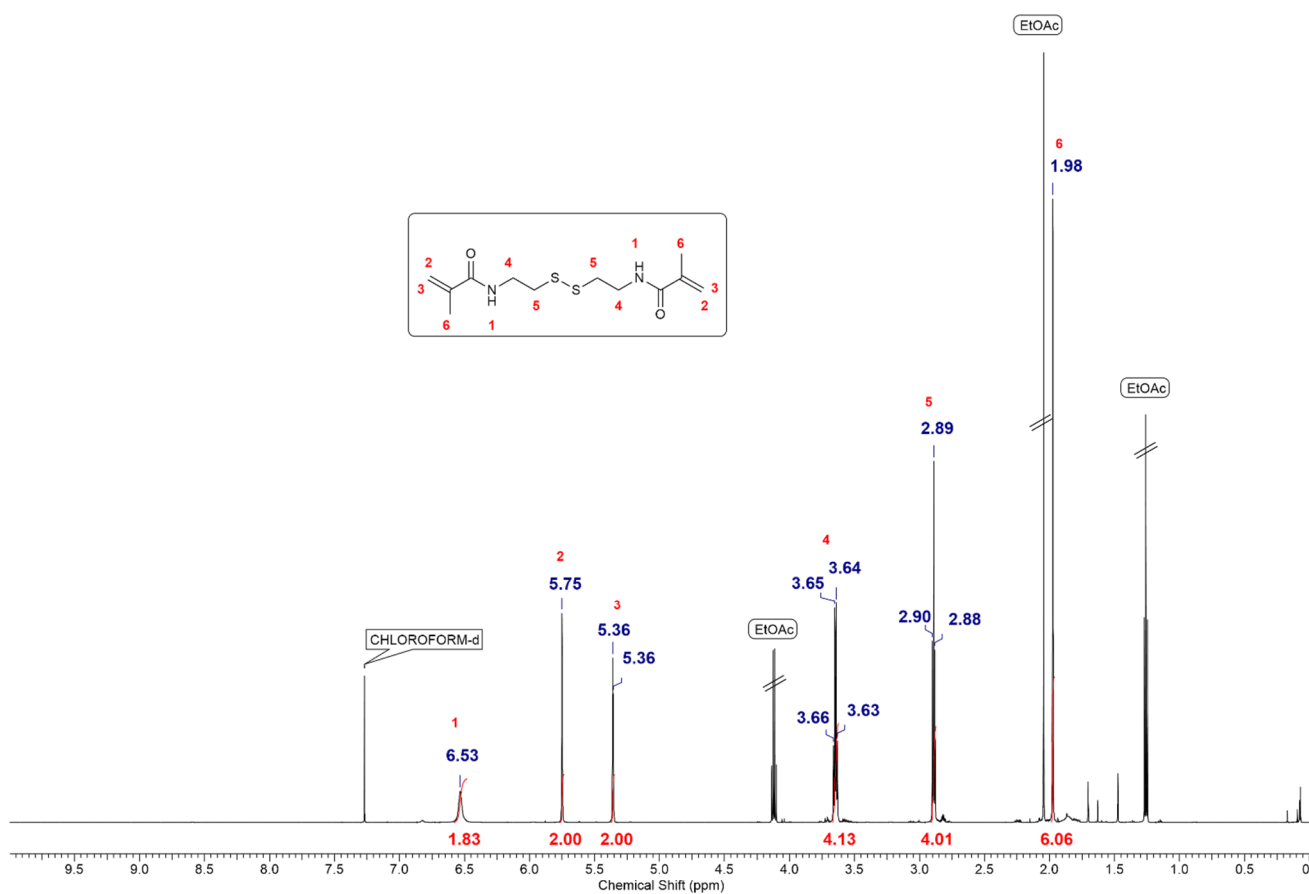

Figure S2.  $^1\text{H}$ -NMR spectrum of BMAC in  $\text{CDCl}_3$ .

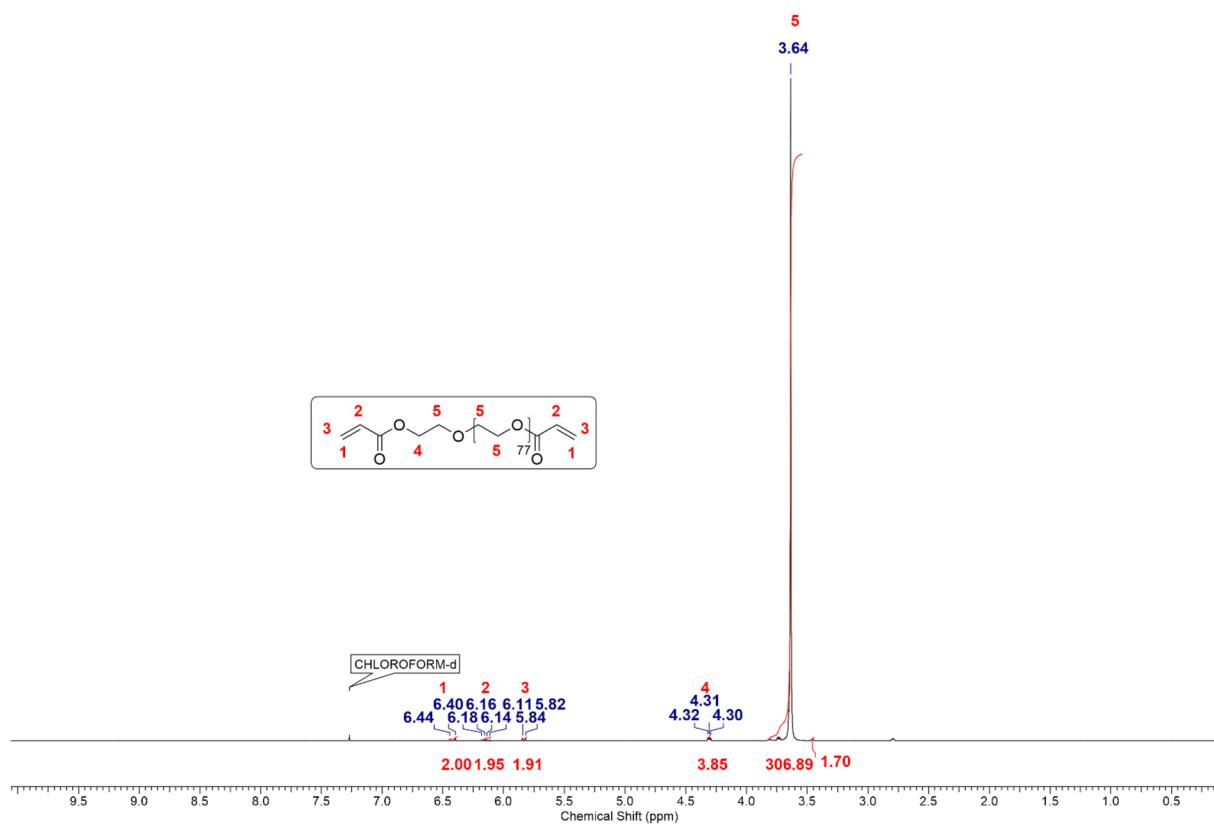

Figure S3.  $^1\text{H}$ -NMR spectrum of PEGDA3500 in  $\text{CDCl}_3$ .

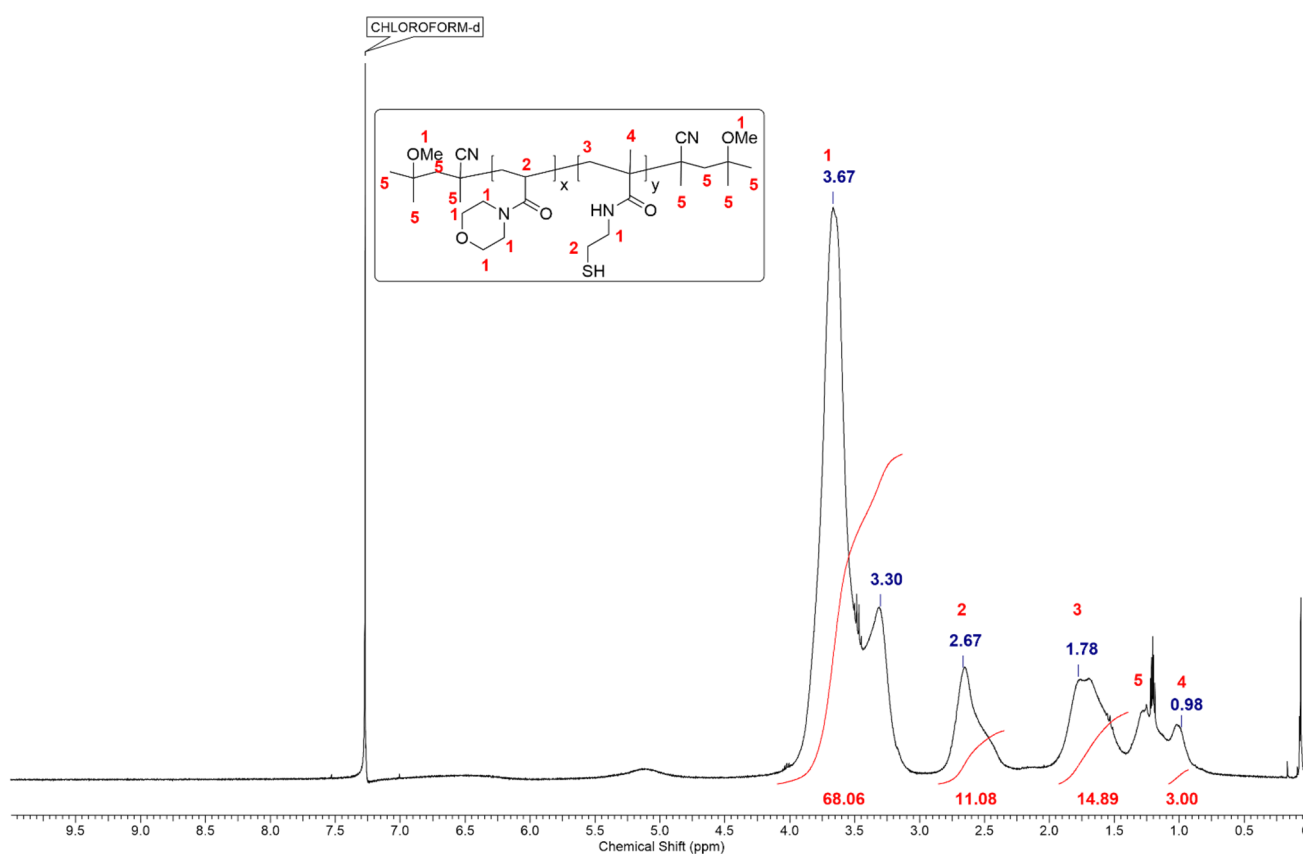

Figure S4. Exemplary <sup>1</sup>H-NMR spectrum of PAMor-co-BMAC P1 in D<sub>2</sub>O.

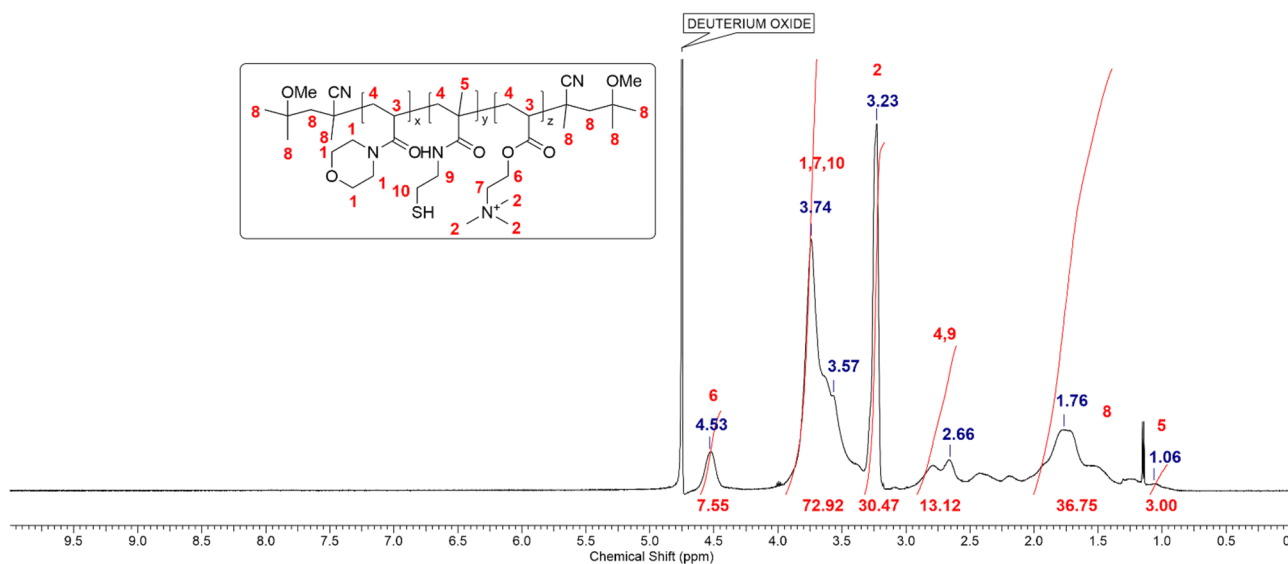

Figure S5. Exemplary <sup>1</sup>H-NMR spectrum of PAMor-co-BMAC-co-TMAEA P2 in D<sub>2</sub>O.

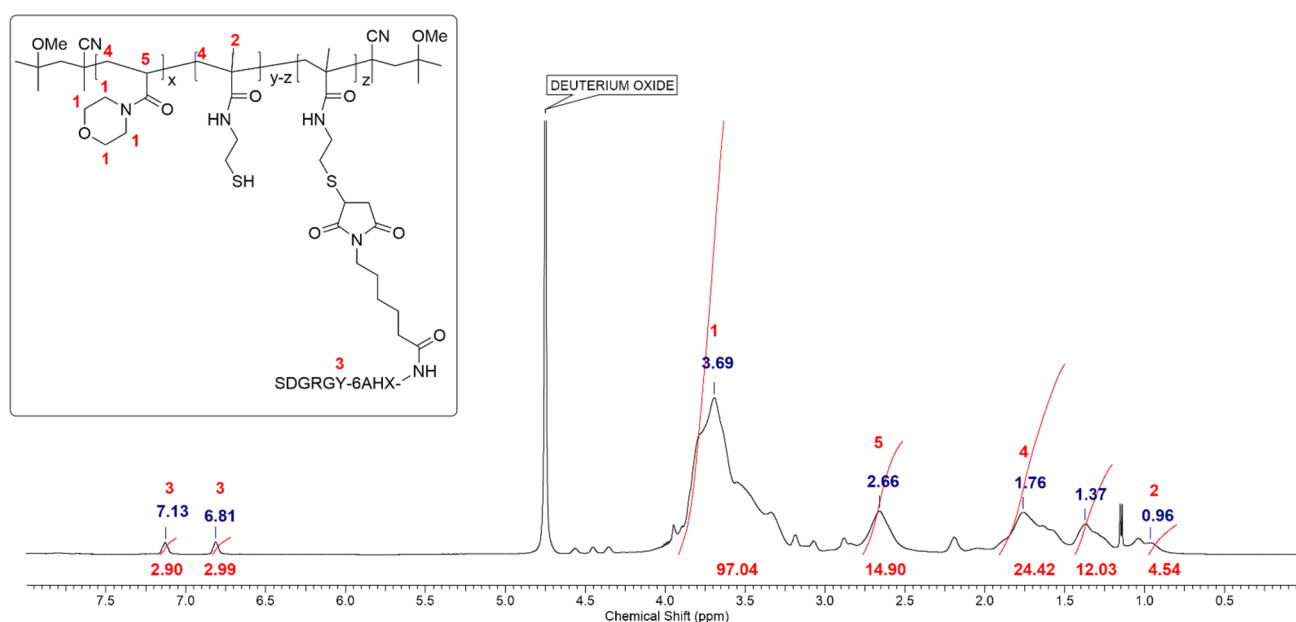

**Figure S6.** Exemplary  $^1\text{H}$ -NMR spectrum of PAMor-co-BMAC-co-RGD **P3** in  $\text{D}_2\text{O}$ .

**Table S1.** Physical data of hydrogels for 2D cell experiments in water.

| Gel              | Composition         | Concentration of Functional Groups [ $\mu\text{mol}/\text{mg}$ ] <sup>e)</sup> | $Q$ <sup>d)</sup> | $E$ <sup>e)</sup> [kPa] | $\zeta$ -Potential <sup>f)</sup> [mV] |
|------------------|---------------------|--------------------------------------------------------------------------------|-------------------|-------------------------|---------------------------------------|
| G1               | AMor-BMAC           | -                                                                              | 13.3 $\pm$ 0.2    | 7.8 $\pm$ 0.2           | -3.9 $\pm$ 1.6                        |
| G2 <sup>a)</sup> | AMor-BMAC-TMAEA     | 0.91                                                                           | 16.9 $\pm$ 0.2    | 15.4 $\pm$ 3.1          | +42.1 $\pm$ 3.7                       |
| G3               | AMor-BMAC-RGD       | 0.26                                                                           | 34.1              | 2.2 <sup>g)</sup>       | -15.4 $\pm$ 1.8                       |
| G4 <sup>b)</sup> | AMor-BMAC-TMAEA-RGD | 0.63/0.13                                                                      | 31.4              | 4.7 <sup>g)</sup>       | +36.6 $\pm$ 2.5                       |
| G5 <sup>a)</sup> | AMor-BMAC-TMAEA     | 0.46                                                                           | 12.4 $\pm$ 0.3    | 14.2 $\pm$ 3.0          | +35.1 $\pm$ 2.8                       |
| G6 <sup>a)</sup> | AMor-BMAC-TMAEA     | 0.23                                                                           | 9.5 $\pm$ 0.1     | 10.6 $\pm$ 1.3          | +31.5 $\pm$ 1.9                       |
| G7 <sup>a)</sup> | AMor-BMAC-TMAEA     | 0.11                                                                           | 9.0 $\pm$ 0.4     | 10.6 $\pm$ 2.5          | +24.9 $\pm$ 3.3                       |
| G8 <sup>a)</sup> | AMor-BMAC-TMAEA     | 0.06                                                                           | 8.6 $\pm$ 0.1     | 10.8 $\pm$ 1.4          | +20.0 $\pm$ 1.2                       |

a) Precise cationic concentrations obtained by mixing **P2** with **P1**, b) gel obtained by mixing **P2** and **P3** in a 50:50 ratio, c) concentration of the functional groups in  $\mu\text{mol}$  per  $\text{mg}$  gel, d) measured in triplicates in water, dry weight obtained by freeze-drying fully swollen gels, e) rheology measurements of fully swollen gels in water done in triplicates with a frequency of 1 Hz and a deformation of 1%, f) measured in a 1 mM KCl solution with a concentration of 1  $\text{mg}/\text{mL}$  of free polymer at  $\text{pH}=7$ -8 and 25  $^\circ\text{C}$ . Mean value derived from 10 measurements. For different TMAEA concentrations a mixed solution of **P1** and **P2** with a final polymer concentration of 1  $\text{mg}/\text{mL}$  is used, g) RGD gels were formed in 10wt% solutions while other gels were formed in 18wt% solutions.
